# Supplementary material
Source: PubMed Central journal article supplement (PMC166408)

**a**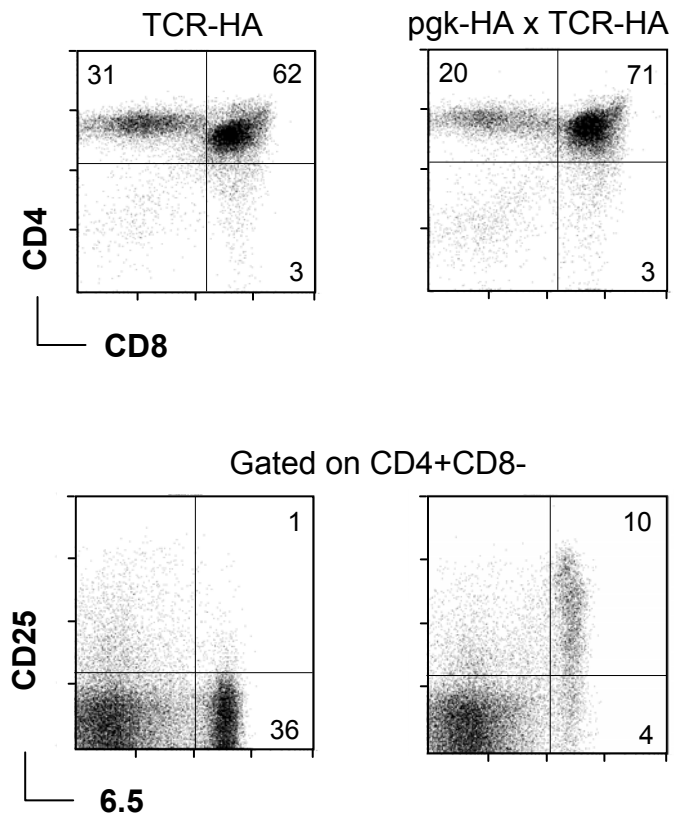**b**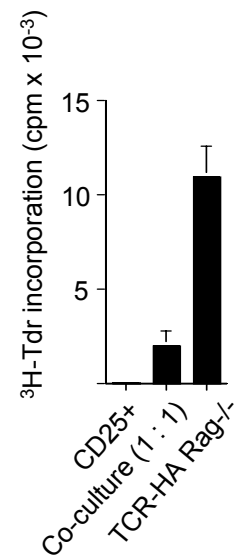

Supplement: pnas_1533365100_2.pdf [file pnas_1533365100_2.pdf]

**a**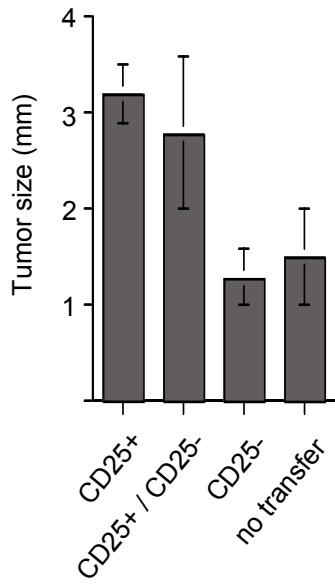**b**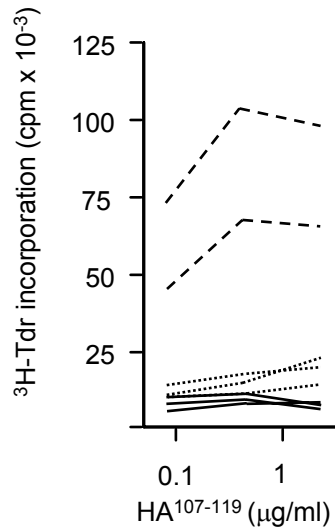

Supplement: pnas_1533365100_4.pdf [file pnas_1533365100_4.pdf]

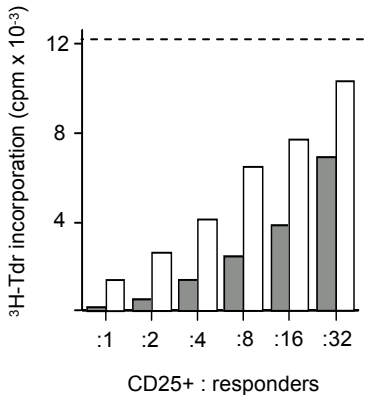

Supplement: pnas_1533365100_6.pdf [file pnas_1533365100_6.pdf]

$3 \times 10^5$  6.5+ CD25+

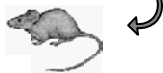

$3 \times 10^5$  6.5+ CD25+  
and  
 $3 \times 10^5$  6.5+ CD25-

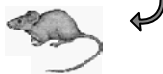

$3 \times 10^5$  6.5+ CD25-

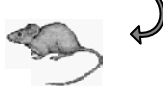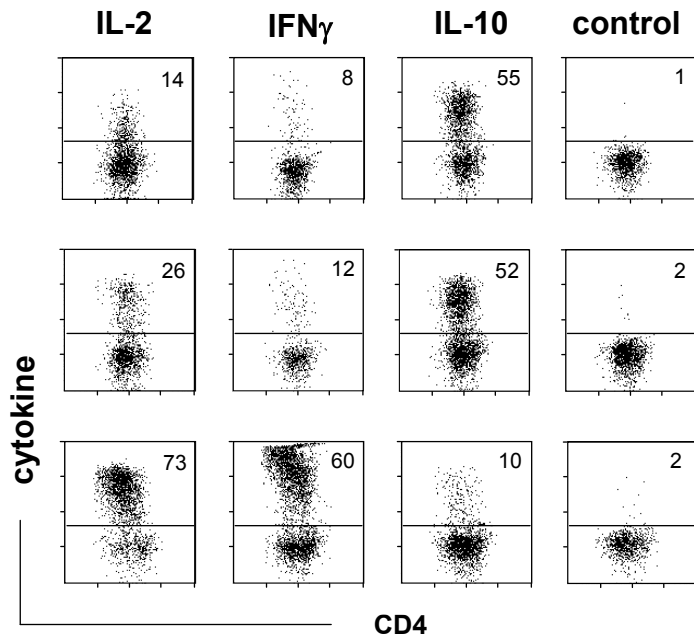

Supplement: pnas_1533365100_8.pdf [file pnas_1533365100_8.pdf]
